# Supplementary material for: Validation of ACE-FTS version 5.2 ozone data with ozonesonde measurements
Source: Copernicus journal article supplement (doi:10.5194/amt-17-6983-2024), 2024-12-12
Supplement: Supplementary file 1 [file amt-17-6983-2024-supplement.pdf]

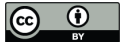

*Supplement of*

## **Validation of ACE-FTS version 5.2 ozone data with ozonesonde measurements**

**Jiansheng Zou et al.**

*Correspondence to:* Kaley A. Walker ([kaley.walker@utoronto.ca](mailto:kaley.walker@utoronto.ca))

The copyright of individual parts of the supplement might differ from the article licence.

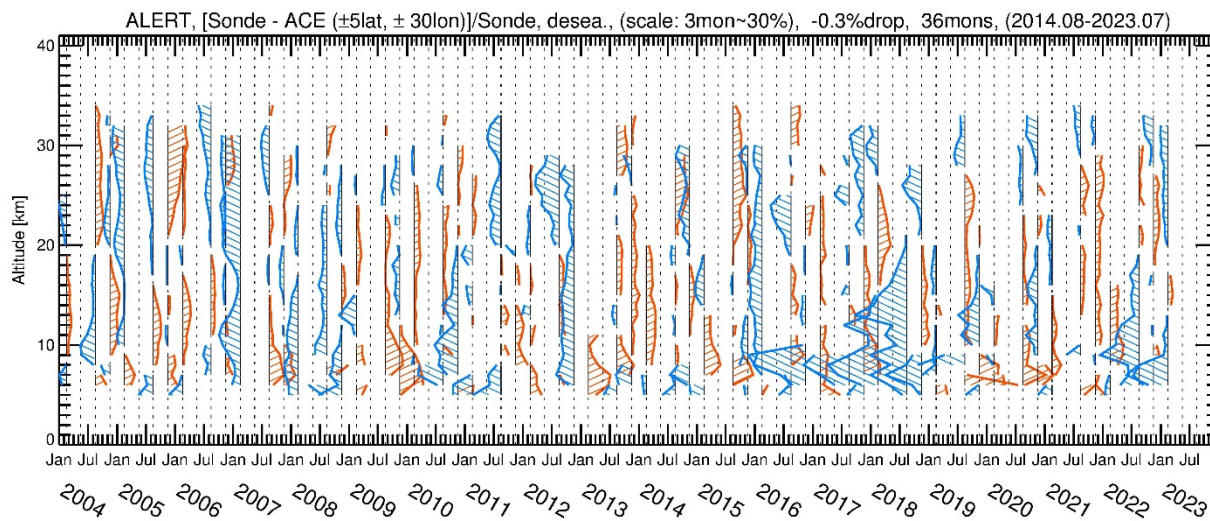

Fig. S1 Seasonally averaged relative differences (%) between the ozonesonde and ACE-FTS de-seasonalized monthly mean time series at Alert, Canada. The red/blue colors indicate the positive/negative differences, respectively. A scale of 30% relative difference is represented by the distance between the two adjacent dashed lines (3 months). The drop-off amount, the period, and the number of months of operating EnSci sondes with S/N > 25000 are indicated at the top. The following figures are similar for the different stations.

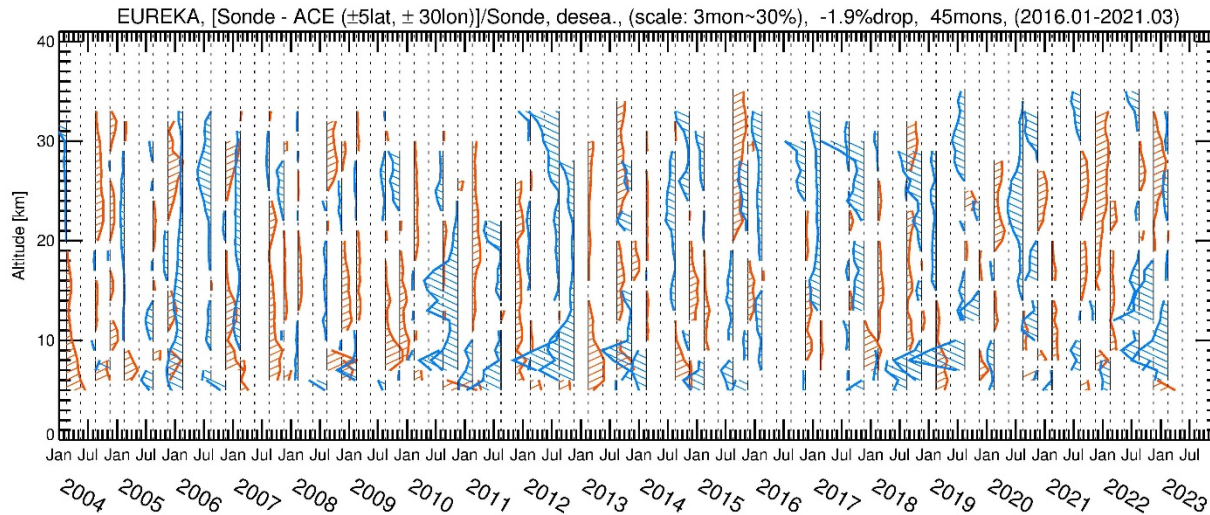

Fig. S2 Eureka

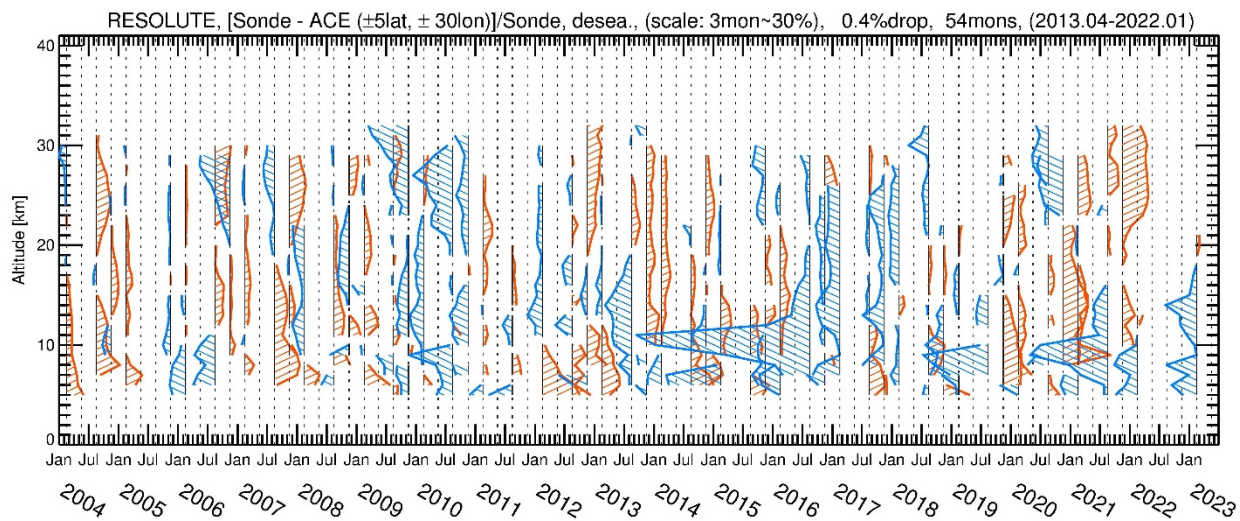

Fig. S3 Resolute

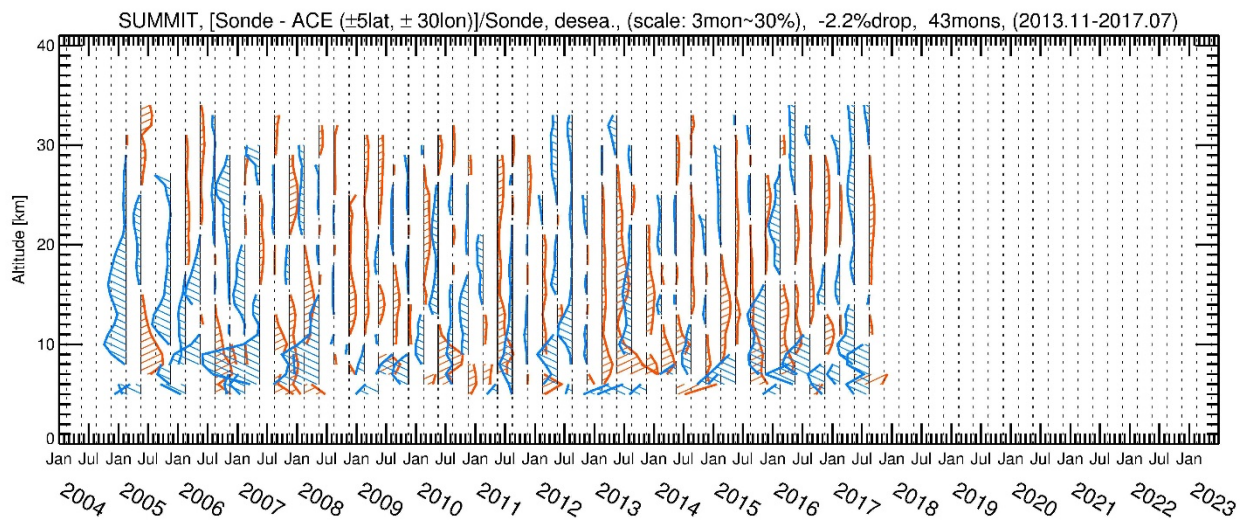

Fig. S4 Summit



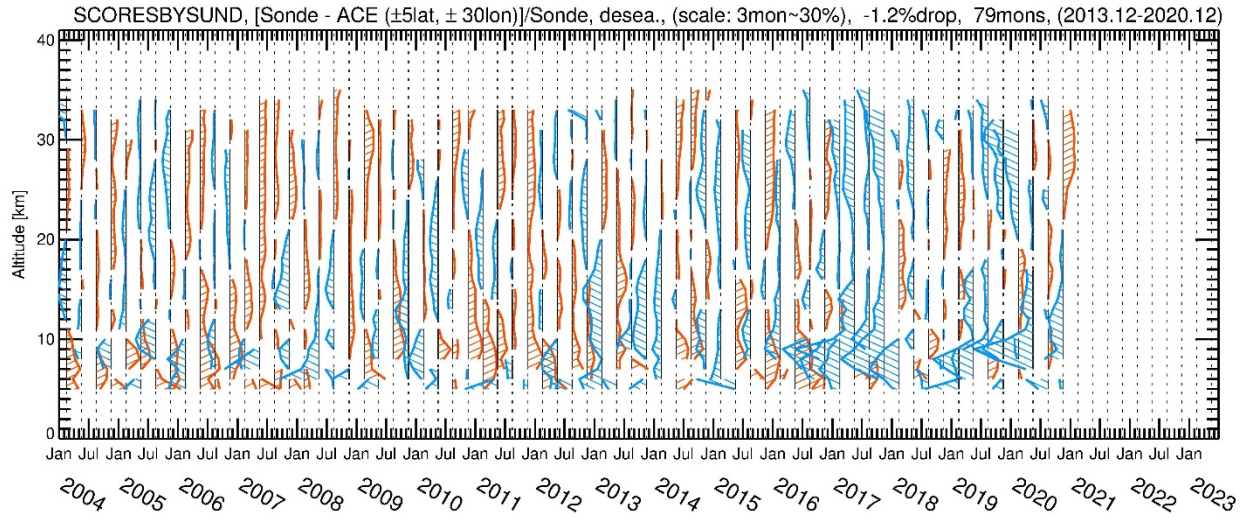

Fig. S5 Scoresbysund

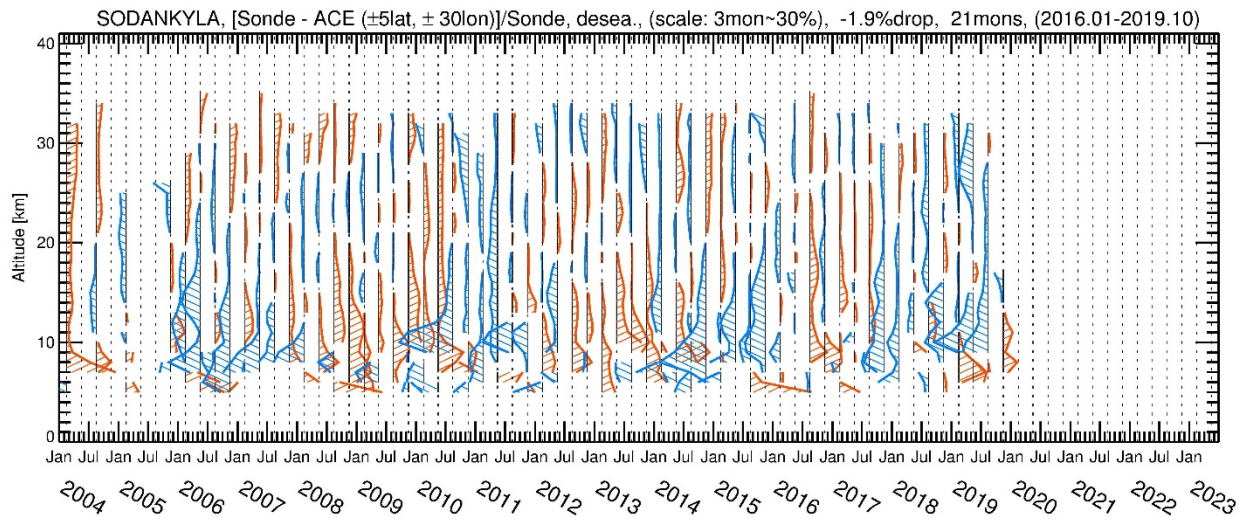

Fig. S6 Sodankyla



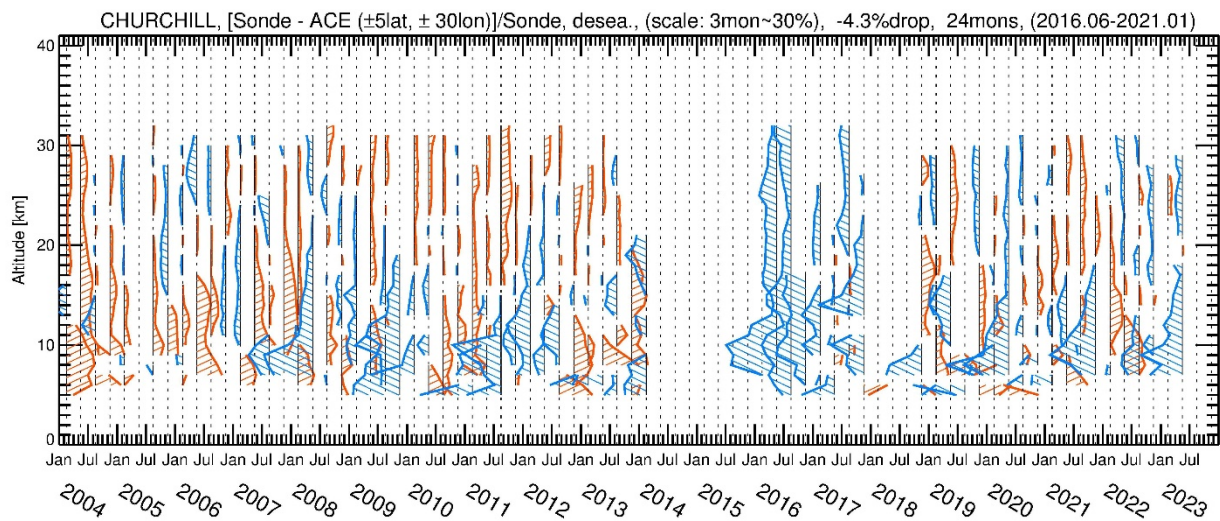

Fig. S7 Churchill

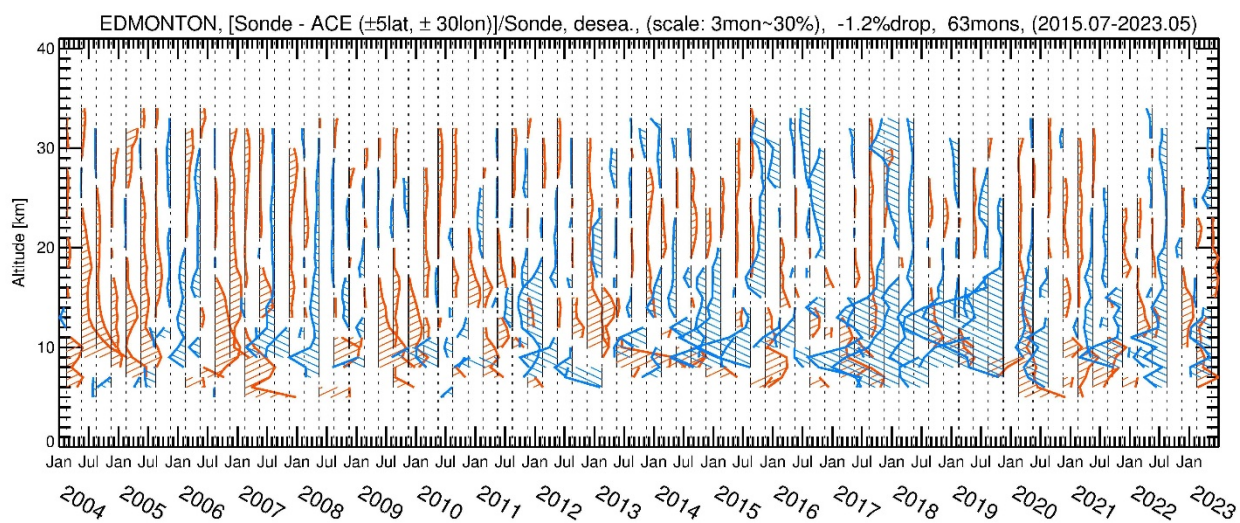

Fig. S8 Edmonton

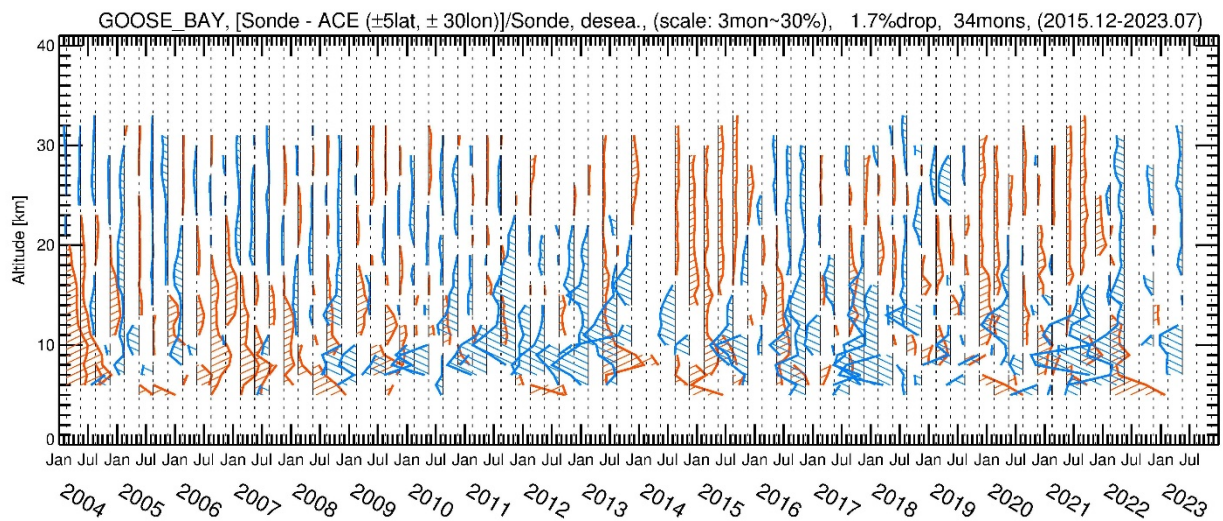

Fig. S9 Goose Bay

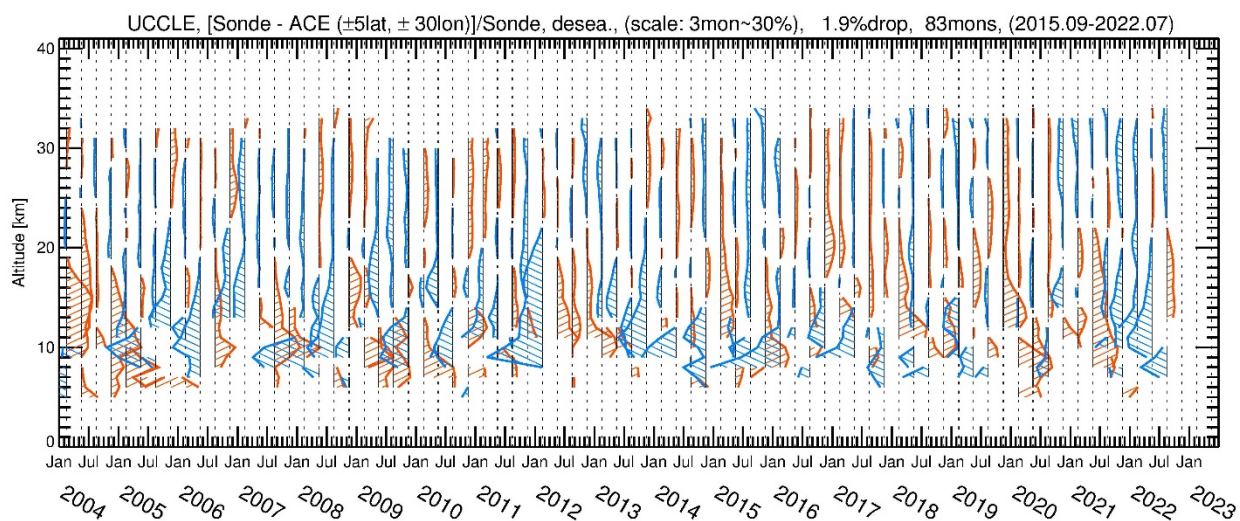

Fig. S10 UCCLE







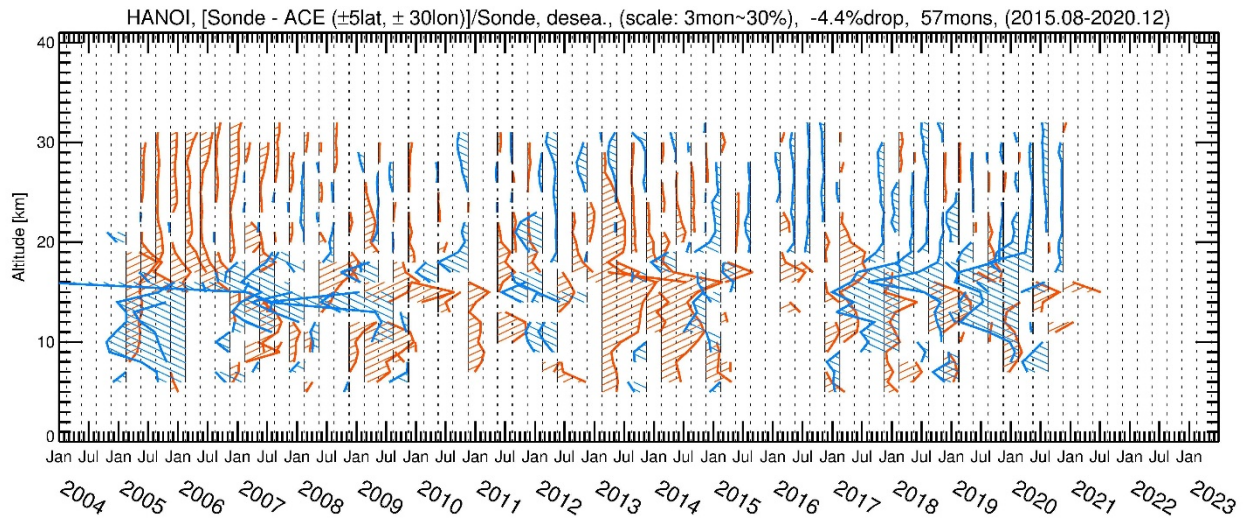

Fig. S13 Hanoi

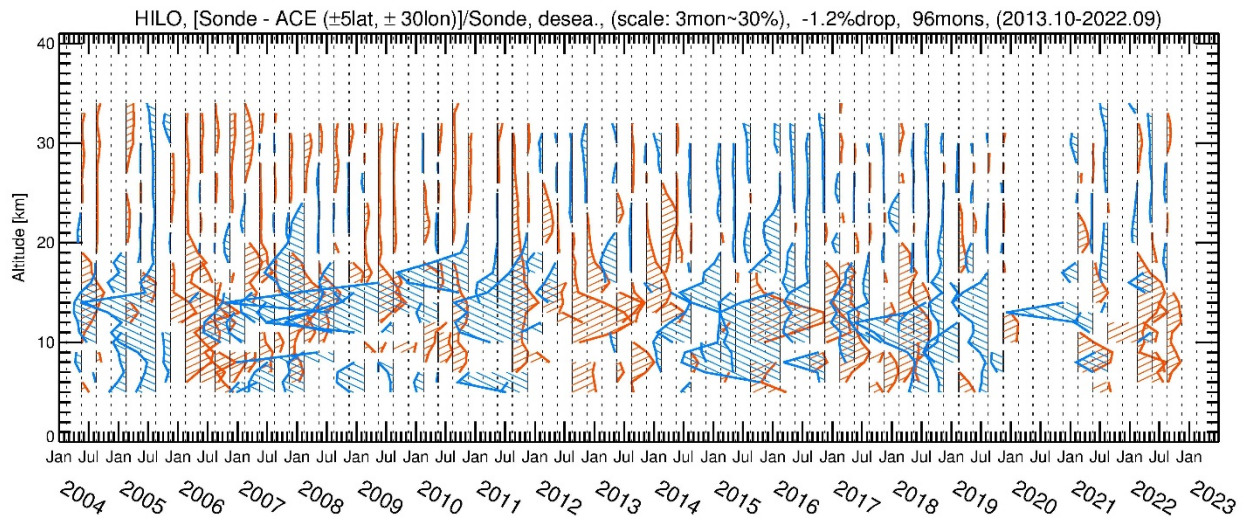

Fig. S14 Hilo

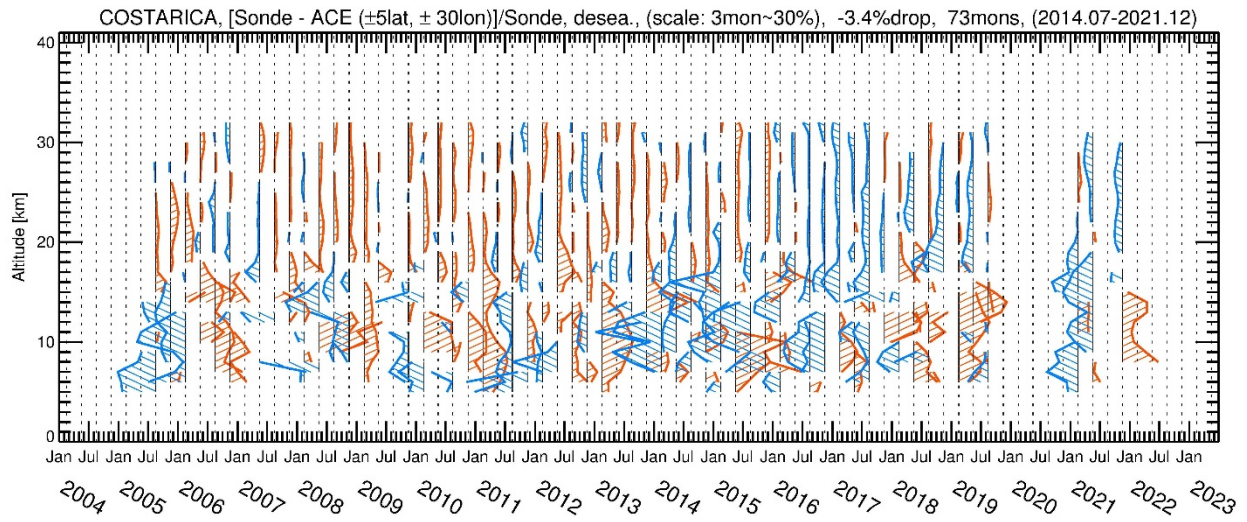

Fig. S15 Costa Rica

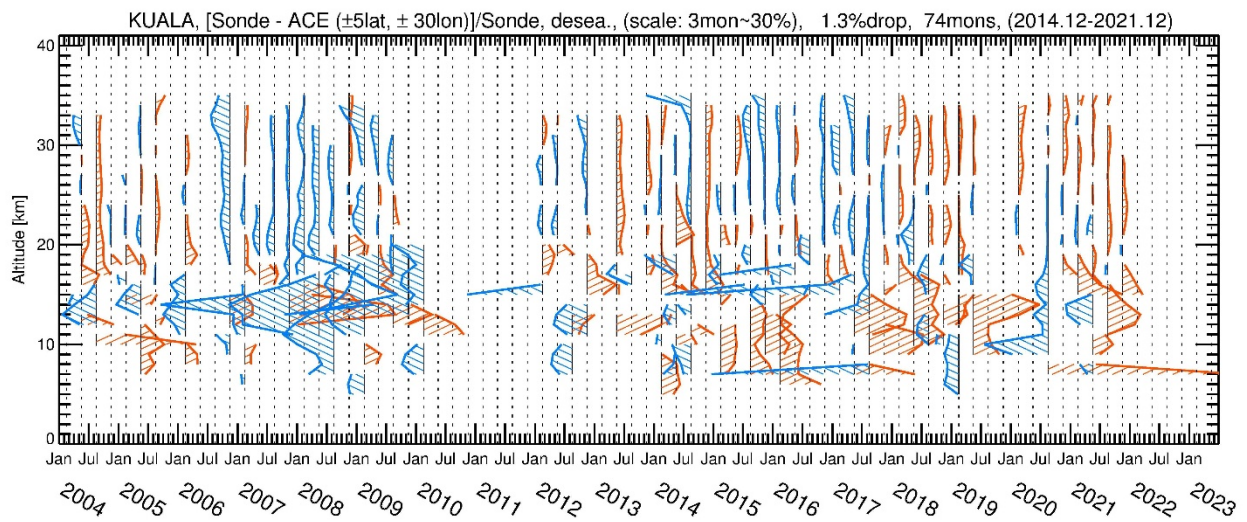

Fig. S16 Kuala Lumpur



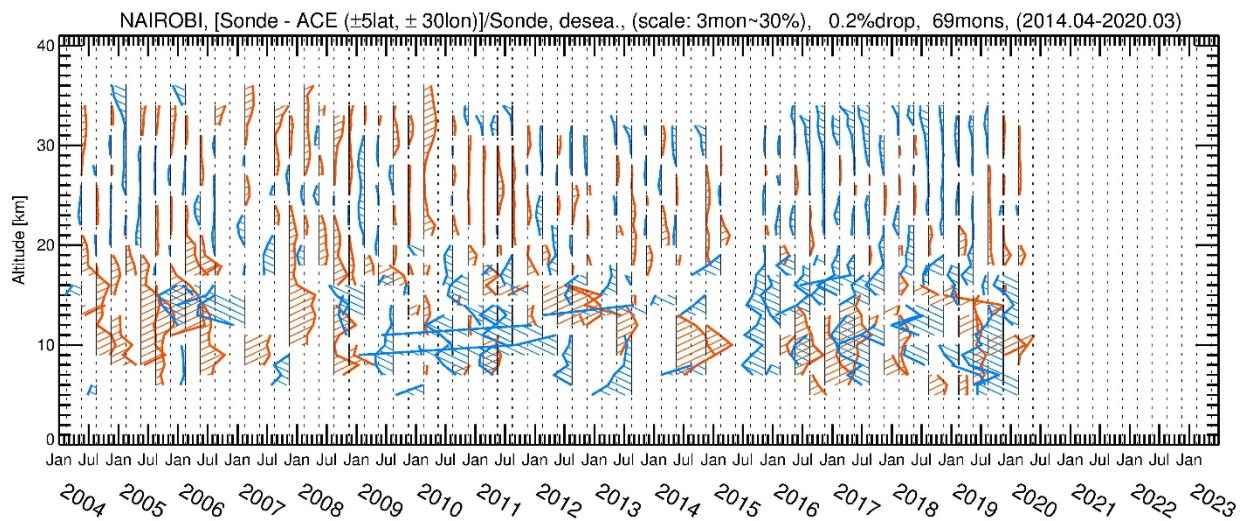

Fig. S17 Nairobi

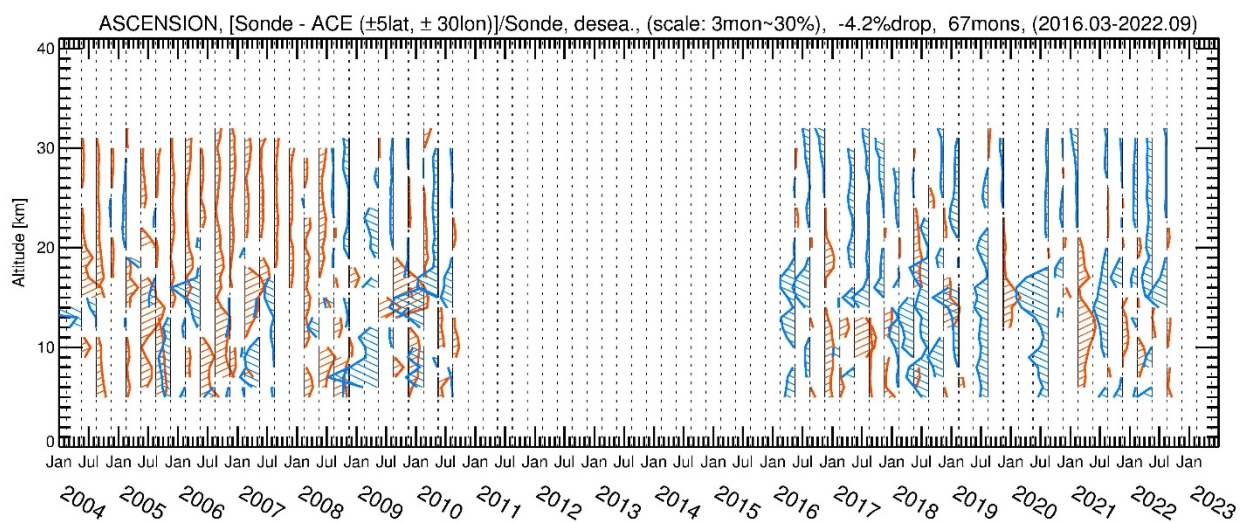

Fig. S18 Ascension





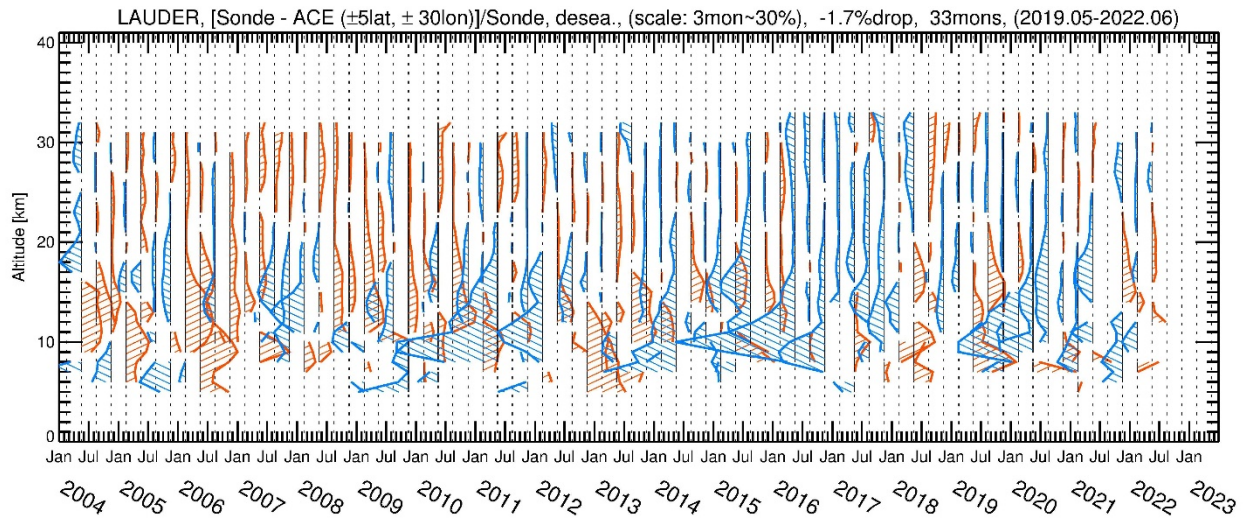

Fig. S21 Lauder

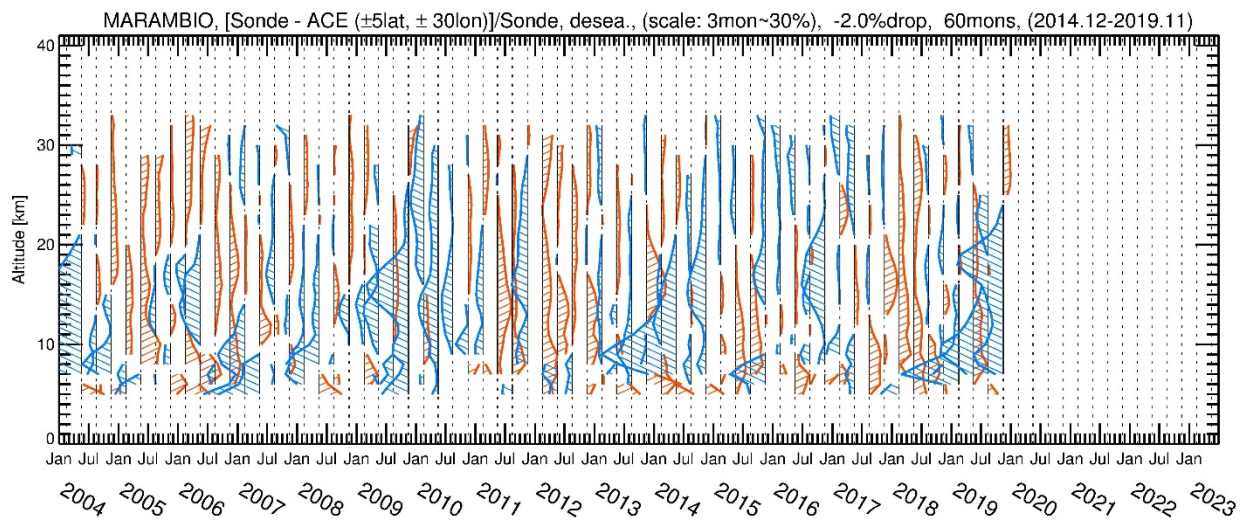

Fig. S22 Marambio
